# Supplementary material for: Successive Sample Selection and Its Relevance for Management Decisions
Source: Atypon-hosted journal article supplement (doi:10.1287/mksc.1120.0754), 2012-12-18
Supplement: mksc.1120.0754-sm-ec.pdf [file mksc.1120.0754-sm-ec.pdf]

# **Successive sample selection and its relevance for management decisions**

## **Web-Appendix**

Stephan Wachtel

Thomas Otter

Goethe University, Frankfurt, Germany

## Web-Appendix 1: Illustration of MCMC performance using simulated data

To illustrate the performance of our MCMC algorithm we report results from the analyses of two simulated data sets. The first simulated data set features three successive selection stages without unobserved dependence, eight observed covariates in total and 5,000 (multivariate) observations. We analyze this data set with our prior formulated over all possible exclusion restrictions to show that we recover the special case of independence across selection stages correctly. We refer to our proposed prior as the adaptively parsimonious (AP) model. We re-analyze the same data set estimating a saturated model to illustrate the practical problems due to weak empirical identification. The saturated model includes all observed covariates on all stages and employs a standard weakly informative inverse Wishart (IW) prior for the covariance matrix  $\Sigma$ .

Table W1.1 shows that the posterior excludes coefficients that connect stage specific unobservables with following stages most of the time (see column three). Marginally, these coefficients are estimated to be essentially equal to zero (see column four), correctly reflecting the independence that generated the data.

Table W1.1 Data generating  $\lambda$  coefficients (True), posterior inclusion probabilities, and posterior means from the adaptively parsimonious model (AP), posterior standard deviations in parentheses

|                | True | inclusion prob | posterior means<br>(standard<br>deviations) |
|----------------|------|----------------|---------------------------------------------|
| $\lambda_{21}$ | 0    | .211           | -0.005 (.069)                               |
| $\lambda_{31}$ | 0    | .298           | 0.038 (.103)                                |
| $\lambda_{32}$ | 0    | .400           | -0.010 (.130)                               |

Table W1.2 shows that exclusions (inclusions) of observed covariates on the various stages are almost perfectly recovered.

Table W1.2 True inclusions (1) and exclusions (0) and posterior means of inclusion probabilities from the adaptively parsimonious model (AP)

|     | Stage 1 |            | Stage 2 |            | Stage 3 |            |
|-----|---------|------------|---------|------------|---------|------------|
|     | True    | incl. prob | True    | incl. prob | True    | incl. prob |
| X_1 | 1       | 1.000      | 0       | 0.059      | 0       | 0.092      |
| X_2 | 1       | 1.000      | 0       | 0.037      | 0       | 0.183      |
| X_3 | 0       | 0.024      | 1       | 1.000      | 0       | 0.059      |
| X_4 | 0       | 0.033      | 1       | 1.000      | 0       | 0.064      |
| X_5 | 0       | 0.077      | 1       | 0.795      | 0       | 0.079      |
| X_6 | 1       | 1.000      | 1       | 1.000      | 1       | 1.000      |
| X_7 | 0       | 0.056      | 0       | 0.040      | 1       | 1.000      |
| X_8 | 0       | 0.036      | 0       | 0.032      | 1       | 1.000      |

The comparison between the saturated model (S) and the AP-model based on our prior over all possible sets of exclusions reveals that the full model incorrectly infers a highly statistically credible, negative correlation between stage 1 and 3 (see column three of Table W1.3). In contrast, the AP model recovers the independence across selection stages nicely (see column four of Table W1.3) as implied by the results presented in Table W1.1.

Table W1.3 Data generating correlations between selection stages (True) and posterior means from the full model (F) and the adaptively parsimonious model (AP), posterior standard deviations in parentheses

|             | True | F            | AP           |
|-------------|------|--------------|--------------|
| $\rho_{21}$ | 0    | .034 (.214)  | -.005 (.069) |
| $\rho_{31}$ | 0    | -.962 (.042) | .038 (.103)  |
| $\rho_{32}$ | 0    | .075 (.201)  | -.010 (.130) |

Figures W1.1a and W1.1b exhibit trace-plots of implied correlations from the AP model and the saturated (S) model respectively. We ran each sampler for 500,000 iterations and include every hundredth draw in these plots. The posterior mode explored by the saturated model can be traced back to properties of the corresponding multivariate likelihood and the shape of the weakly informative IW prior. The multivariate likelihood increases without bounds as the covariance matrix  $\Sigma$  and the implied correlation matrix approach rank deficiency. Therefore the problem with spuriously extreme correlations in these models is genuine and not just a feature of a specific type of

Bayesian analysis. However, so called weakly informative IW priors do not help here as they are concentrated on covariance matrices exhibiting extreme dependencies by construction (Rossi et al. 2005).

Figure W1.1a Trace-plots of correlations AP model

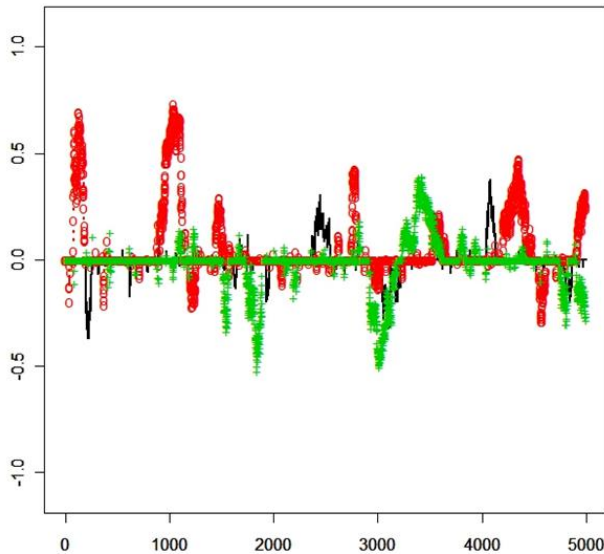

Figure W1.1b Trace-plots of correlations F model

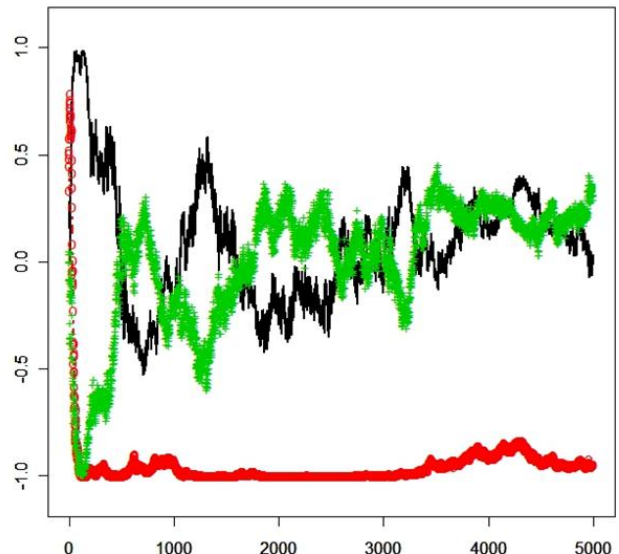

As a consequence, the full model fails to recover the structural effects of observed covariates on stage 3 (Table W1.4). For example, the full model overestimates the constant and spuriously suggests that X\_2 and X\_5 should be included on stage 3 (see column 9 in Table W1.4). However, there is no causal ordering between the bias in the unobserved dependence structure and the bias in the estimated regression coefficients. In a sense, the bias in the unobserved dependence structure occurs precisely because all observed covariates are entered on all stages by the full model.

Table W1.4 Data generating coefficients (True) and posterior means from the full model (F) and the adaptively parsimonious model (AP), posterior standard deviations in parentheses

|          | Stage 1 |                               |                               | Stage 2 |                               |                               | Stage 3 |                               |                               |
|----------|---------|-------------------------------|-------------------------------|---------|-------------------------------|-------------------------------|---------|-------------------------------|-------------------------------|
|          | True    | F                             | AP                            | True    | F                             | AP                            | True    | F                             | AP                            |
| Constant | .032    | .052<br>(.073)                | .020<br>(.047)                | .024    | .006<br>(.116)                | .018<br>(.086)                | .032    | <b>.614</b><br><b>(.198)</b>  | .079<br>(.123)                |
| X_1      | -.063   | <b>-.056</b><br><b>(.015)</b> | <b>-.053</b><br><b>(.014)</b> | 0       | -.018<br>(.022)               | -.001<br>(.005)               | 0       | .020<br>(.019)                | -.002<br>(.009)               |
| X_2      | .126    | <b>.126</b><br><b>(.015)</b>  | <b>.130</b><br><b>(.014)</b>  | 0       | -.004<br>(.019)               | -.000<br>(.004)               | 0       | <b>-.079</b><br><b>(.020)</b> | -.006<br>(.016)               |
| X_3      | 0       | .015<br>(.014)                | .000<br>(.002)                | -.097   | <b>-.066</b><br><b>(.018)</b> | <b>-.069</b><br><b>(.018)</b> | 0       | -.016<br>(.020)               | -.000<br>(.006)               |
| X_4      | 0       | .016<br>(.015)                | .000<br>(.003)                | .073    | <b>.071</b><br><b>(.019)</b>  | <b>.083</b><br><b>(.020)</b>  | 0       | -.028<br>(.021)               | -.001<br>(.006)               |
| X_5      | 0       | -.026<br>(.015)               | -.002<br>(.007)               | .049    | <b>.052</b><br><b>(.021)</b>  | <b>.044</b><br><b>(.027)</b>  | 0       | <b>.048</b><br><b>(.020)</b>  | -.002<br>(.011)               |
| X_6      | .063    | <b>.058</b><br><b>(.014)</b>  | <b>.060</b><br><b>(.014)</b>  | .121    | <b>.092</b><br><b>(.018)</b>  | <b>.096</b><br><b>(.019)</b>  | .126    | <b>.059</b><br><b>(.024)</b>  | <b>.114</b><br><b>(.024)</b>  |
| X_7      | 0       | .005<br>(.015)                | .001<br>(.005)                | 0       | .019<br>(.018)                | .001<br>(.004)                | -.158   | <b>-.122</b><br><b>(.019)</b> | <b>-.188</b><br><b>(.023)</b> |
| X_8      | 0       | -.009<br>(.013)               | -.000<br>(.003)               | 0       | -.001<br>(.017)               | .000<br>(.003)                | .095    | <b>.066</b><br><b>(.018)</b>  | <b>.101</b><br><b>(.022)</b>  |

Our second simulated data set illustrates how our MCMC algorithm recovers the finer structure in the unobserved dependence among successive selections. The data set features three successive selection stages with structured unobserved dependence, eight observed covariates in total and 10,000 (multivariate) observations. The structure of the unobserved dependence between selection stages is such that unobservables only emerging at stage two do not directly influence the outcome on stage three, i.e.  $\lambda_{32} = 0$  (see the column ‘True’ in Table W1.5). That is, all dependence between stage two and stage three comes through the joint influence of unobservables emerging at stage one. These unobservables have a positive effect on the success on stage two but a negative one on stage three giving rise to a negative correlation between stages two and three,  $\rho_{32} = -.210$  (see Table W1.7).

Tables W1.5 through W1.8 demonstrate that the MCMC implementation of our prior over all possible exclusion restrictions nicely recovers both the data generating model structure as well as the data generating parameter values.

Table W1.5 Data generating  $\lambda$  coefficients (True), posterior inclusion probabilities, and posterior means from the adaptively parsimonious model, posterior standard deviations in parentheses

|                | True   | inclusion prob | posterior means<br>(standard deviations) |
|----------------|--------|----------------|------------------------------------------|
| $\lambda_{21}$ | 0.696  | 1.000          | 0.612 (.056)                             |
| $\lambda_{31}$ | -0.302 | .829           | -0.284 (.167)                            |
| $\lambda_{32}$ | 0      | .228           | -0.047 (.112)                            |

Table W1.6 True inclusions (1) and exclusions (0) and posterior means of inclusion probabilities from the adaptively parsimonious model

|     | Stage 1 |            | Stage 2 |            | Stage 3 |            |
|-----|---------|------------|---------|------------|---------|------------|
|     | True    | incl. prob | True    | incl. prob | True    | incl. prob |
| X_1 | 1       | 1.000      | 0       | 0.055      | 0       | 0.174      |
| X_2 | 1       | 1.000      | 0       | 0.029      | 0       | 0.062      |
| X_3 | 0       | 0.016      | 1       | 1.000      | 0       | 0.088      |
| X_4 | 0       | 0.021      | 1       | 1.000      | 0       | 0.054      |
| X_5 | 0       | 0.015      | 1       | 1.000      | 0       | 0.063      |
| X_6 | 1       | 1.000      | 1       | 1.000      | 1       | 1.000      |
| X_7 | 0       | 0.055      | 0       | 0.093      | 1       | 1.000      |
| X_8 | 0       | 0.029      | 0       | 0.270      | 1       | 1.000      |

Table W1.7 Data generating correlations between selection stages (True) and posterior means from the adaptively parsimonious model, posterior standard deviations in parentheses

|             | True  | Estimates    |
|-------------|-------|--------------|
| $\rho_{21}$ | .661  | .611 (.056)  |
| $\rho_{31}$ | -.286 | -.284 (.166) |
| $\rho_{32}$ | -.210 | -.137 (.111) |

Table W1.8 Data generating coefficients (True) and posterior means from the adaptively parsimonious model, posterior standard deviations in parentheses

|          | Stage 1 |              | Stage 2 |              | Stage 3 |              |
|----------|---------|--------------|---------|--------------|---------|--------------|
|          | True    | Estimates    | True    | Estimates    | True    | Estimates    |
| Constant | .253    | .216 (.028)  | .139    | .174 (.079)  | .241    | .229 (.118)  |
| X_1      | -.313   | -.309 (.011) | 0       | .001 (.005)  | 0       | -.007 (.018) |
| X_2      | .196    | .211 (.011)  | 0       | .000 (.002)  | 0       | -.001 (.005) |
| X_3      | 0       | .000 (.002)  | -.132   | -.132 (.014) | 0       | .002 (.007)  |
| X_4      | 0       | -.000 (.002) | .134    | .157 (.013)  | 0       | .001 (.005)  |
| X_5      | 0       | .000 (.001)  | .157    | .149 (.014)  | 0       | .001 (.005)  |
| X_6      | .285    | .288 (.011)  | .122    | .112 (.019)  | .217    | .225 (.030)  |
| X_7      | 0       | .001 (.004)  | 0       | -.002 (.008) | -.226   | -.225 (.015) |
| X_8      | 0       | -.000 (.003) | 0       | .008 (.015)  | .271    | .270 (.015)  |

## Web-Appendix 2: Identification in Selection Models

We discuss identification of regression coefficients and unobserved dependence from the joint distribution of  $y_1$  and  $y_2$  using the example from Figure 1. Here we assume that we know a priori that  $x_1$  affects  $y_1$  and  $x_2$  affects  $y_2$ , i.e. we do not have to select variables, and show how exclusion restrictions identify the model.

Table W2.1 Covariate patterns

| Pattern  | $x_1$ | $x_2$ |
|----------|-------|-------|
| <b>A</b> | 1     | 1     |
| <b>B</b> | 1     | -1    |
| <b>C</b> | -1    | 1     |
| <b>D</b> | -1    | -1    |

Table W2.1 collects all possible covariate patterns for  $x_1$  and  $x_2$  assuming that both covariates take only two different values. The general case of continuous covariates is messier in terms of notation but in essence identical. The covariates affecting  $y_1$  and  $y_2$  are perfectly orthogonal. Assuming non-zero coefficients, we see that the unobserved dependence between selection stages  $(\lambda_{21})^1$  is identified through differences in probabilities between response patterns with the same  $x_2$  but different  $x_1$  from the following set of inequalities:

$$\begin{aligned}
 p\left(y_2 \mid \overbrace{x_1 = 1, x_2 = 1, y_1 = 1}^A\right) &\neq p\left(y_2 \mid \overbrace{x_1 = -1, x_2 = 1, y_1 = 1}^C\right) \\
 p\left(y_2 \mid \overbrace{x_1 = 1, x_2 = -1, y_1 = 1}^B\right) &\neq p\left(y_2 \mid \overbrace{x_1 = -1, x_2 = -1, y_1 = 1}^D\right)
 \end{aligned}
 \tag{W2-1}$$

---

<sup>1</sup> As explained in the paper, parameters  $\{\beta\}$  and  $\{\lambda\}$  are not jointly likelihood identified from choice data. We project down to the likelihood identified space by normalizing the variances to 1. Our discussion here implicitly refers to the identified transformations of  $\{\beta\}$  and  $\{\lambda\}$ .

The regression coefficient on the second stage,  $\beta_2$ , is identified through differences in probabilities among response patterns with the same  $x_1$  but different  $x_2$  values from the following set of inequalities:

$$\begin{aligned} p\left(y_2 \mid \overbrace{x_1 = 1, x_2 = 1}^A, y_1 = 1\right) &\neq p\left(y_2 \mid \overbrace{x_1 = 1, x_2 = -1}^B, y_1 = 1\right) \\ p\left(y_2 \mid \overbrace{x_1 = -1, x_2 = 1}^C, y_1 = 1\right) &\neq p\left(y_2 \mid \overbrace{x_1 = -1, x_2 = -1}^D, y_1 = 1\right) \end{aligned} \quad (\text{W2-2})$$

Note that we have two independent inequalities to identify the unobserved dependence and two more independent inequalities to identify  $\beta_2$ . Identification of the regression coefficient on the first stage,  $\beta_1$ , is standard and simply requires sufficient variation in  $x_1$ .

Deleting response patterns from Table W2.1 introduces covariance between  $x_1$  and  $x_2$ . To jointly identify the regression coefficient  $\beta_2$  and the unobserved dependence, we need at least two independent inequalities. Deleting pattern A leaves the inequality between B and D, and between C and D to identify dependence and  $\beta_2$ , respectively, similarly for deleting patterns B, C, or D, individually. However, if we delete either B and C, or A and D, we are left with no inequalities to independently identify the two parameters in this example. Note that deleting B and C (A and D) results in perfectly positively (negatively) correlated  $x_1$  and  $x_2$ . Finally, jointly deleting A and B or C and D leaves  $\beta_1$  unidentified. Generalizing this result to multiple variables in  $\mathbf{x}_1$  and  $\mathbf{x}_2$ , we rely on inequalities of the form

$$p\left(y_2 \mid \mathbf{x}'_{1,i} \boldsymbol{\beta}_1 = v_1, \mathbf{x}'_{2,i} \boldsymbol{\beta}_2 = v_2, y_1 = 1\right) \neq p\left(y_2 \mid \mathbf{x}'_{1,j} \boldsymbol{\beta}_1 = v_1^*, \mathbf{x}'_{2,j} \boldsymbol{\beta}_2 = v_2, y_1 = 1\right),$$

i.e. observations with the same value  $\mathbf{x}'_{2,i} \boldsymbol{\beta}_2 = \mathbf{x}'_{2,j} \boldsymbol{\beta}_2 = v_2$  on the second stage but different histories  $v_1$  and  $v_1^*$ , to identify unobserved dependence between selection stages.

Exclusion restrictions help jointly identify regression coefficients and the unobserved dependence structure. Exclusion restrictions result in a set of variables affecting  $y_1$  that is at least partially different from the set of variables affecting  $y_2$ , precluding the problematic case of perfect correlation between  $\mathbf{x}_1'\boldsymbol{\beta}_1$  and  $\mathbf{x}_2'\boldsymbol{\beta}_2$ . Specifically, strong identification requires that  $\mathbf{x}_1$  contains at least one active variable that is excluded from  $\mathbf{x}_2$ . Independent variation in this variable, holding  $\mathbf{x}_2$  constant, identifies that nature of unobserved dependence between stages.<sup>2</sup>

With multiple explanatory variables, the case where the set of variables in  $\mathbf{x}_1$  is identical to the set of variables in  $\mathbf{x}_2$  is identified conditional on parametric assumptions, but requires large amounts of data for empirical identification. The identification status with multiple independent variables, identical across different stages, depends on the pattern in the coefficient vectors  $\boldsymbol{\beta}_1$  and  $\boldsymbol{\beta}_2$ . The more (less) orthogonal the coefficient vectors  $\boldsymbol{\beta}_1$  and  $\boldsymbol{\beta}_2$ , the more (less) independent information about  $\boldsymbol{\beta}_2$  and unobserved dependence between selection stages is available. For a similar result in the context of the correlated multinomial probit model, but obtained using a different approach, see Keane (1992) and Zeithammer and Lenk (2009).

When there are more than two successive selections, we need to identify dependence between successive selections as well as those between current stages and stages before the immediately preceding stage. For example, with three successive selections we have  $\lambda_{21}$ , linking the first to the second stage,  $\lambda_{32}$ , linking the second to the third, and finally  $\lambda_{31}$  linking the first and the third stage. The identification of  $\lambda_{32}$  is analogue to that of  $\lambda_{21}$ . Identification of  $\lambda_{31}$  comes through inequalities of the following form:

$$p\left(y_3 \mid \mathbf{x}'_{1,i}\boldsymbol{\beta}_1 = v_1, \mathbf{x}'_{2,i}\boldsymbol{\beta}_2 = v_2, \mathbf{x}'_{3,i}\boldsymbol{\beta}_3 = v_3, y_1 = 1, y_2 = 1\right) \neq p\left(y_3 \mid \mathbf{x}'_{1,j}\boldsymbol{\beta}_1 = v_1^*, \mathbf{x}'_{2,j}\boldsymbol{\beta}_2 = v_2, \mathbf{x}'_{3,j}\boldsymbol{\beta}_3 = v_3, y_1 = 1, y_2 = 1\right).$$

---

<sup>2</sup> Independent variation in the 'future', i.e.  $\mathbf{x}_2$  holding fixed the 'past'  $\mathbf{x}_1$  only identifies functional forms on the second stage.

That is observations with the same value  $\mathbf{x}'_{3,i}\boldsymbol{\beta}_3 = \mathbf{x}'_{3,j}\boldsymbol{\beta}_3 = v_3$  on the third, the same history  $\mathbf{x}'_{2,i}\boldsymbol{\beta}_2 = \mathbf{x}'_{2,j}\boldsymbol{\beta}_2 = v_2$  on the second but *different* histories  $v_1$  and  $v_1^*$  on the first stage identify  $\lambda_{31}$ .

If a particular data set poses structural identification problems such as in a two stage model with only one observed covariate where  $x_1 = x_2$ , for example, the posterior obtained by updating our prior specified over all possible exclusion restrictions with this data is purely driven by the subjective prior choices for  $p(\alpha)$  and  $p(\{\boldsymbol{\beta}\}, \{\lambda\})$ . However, if the data only weakly identify some models, notably the saturated model entering all covariates on all stages while estimating unstructured dependence, updating our prior with this data extracts all information about the likely model structure, including information from weakly identified models.

### **Web-Appendix 3: Numerical Illustration of DAG results**

We numerically illustrate the theoretical results from Section 3 in the paper comparing dependent analysis to independent analysis in a simple two stage setup under different degrees of unobserved dependence. We also include a comparison to an approach popular in practice that collapses the multi staged process to one stage when measuring probabilities to pass all stages. This ‘collapsing-approach’ ignores all stages but the final, often managerially most important stage, regressing success on the final stage on covariates describing the population of consumers initially entering the process. Failures on any stage prior to the last stage are treated equivalently to a failure on the last stage, i.e.

$$\left[ (y_1 = 0) \vee \dots \vee (y_{last-1} = 0) \right] \Rightarrow y_{last} = 0 \quad (\text{W3-1})$$

This is different from the independent analysis of the last stage which only considers consumers that have successfully passed all selections prior to the last.

We generate observations from a model with two stages and three independently generated covariates overall where  $x_1$  affects  $y_1$ ,  $x_2$  affects  $y_2$ ,  $x_{12}$  affects both  $y_1$  and  $y_2$ , and finally  $y_1$  is a selection criterion (Equation W3-2). We investigate four data generating mechanisms characterized by different degrees of (unobserved) dependence between the first stage and the second stage varying the correlation parameter  $\rho$  in Equation W3-2 over the grid  $[0, .1, .5, .9]$ .<sup>3</sup> We generate 10,000 observations from each data generating mechanism and investigate the performance of ignoring dependence and the collapsing-approach relative to the data generating model in terms of scoring, targeting and influencing. The data generating mechanism with  $\rho = 0$  corresponds to the independence model.

$$y_{1,i} = \begin{cases} 0 & z_{1,i} < 0 \\ 1 & z_{1,i} \geq 0 \end{cases} \quad y_{2,i} = \begin{cases} 0 & (z_{2,i} < 0) \vee (y_{1,i} = 0) \\ 1 & (z_{2,i} \geq 0) \wedge (y_{1,i} = 1) \end{cases}$$

$$\begin{pmatrix} z_{1,i} \\ z_{2,i} \end{pmatrix} = \begin{pmatrix} 1 & x_{1,i} & x_{12,i} & 0 & 0 & 0 \\ 0 & 0 & 0 & 1 & x_{2,i} & x_{12,i} \end{pmatrix} \begin{pmatrix} -.4 \\ .5 \\ .4 \\ -.1 \\ .6 \\ .4 \end{pmatrix} + \begin{pmatrix} \varepsilon_{1,i} \\ \varepsilon_{2,i} \end{pmatrix}, \begin{pmatrix} \varepsilon_{1,i} \\ \varepsilon_{2,i} \end{pmatrix} \sim N\left(\mathbf{0}, \begin{bmatrix} 1 & \rho \\ \rho & 1 \end{bmatrix}\right) \quad (\text{W3-2})$$

$$x_{1,i} \sim N(0, 2)$$

$$x_{2,i} \sim N(0, 2)$$

$$x_{12,i} \sim N(0, 2)$$

Table W3.1 summarizes the inference for regression coefficients from the independence model, the collapsing-approach and the dependence model relative to the data generating values. The first column indicates what stage is analyzed. For the second stage, we report two versions of the independence model. One, ‘the independence model with causal knowledge’ conditions on

---

<sup>3</sup> We use the marginal representation and not the Wold decomposition here for ease of presentation in the special case of only two successive stages.

knowing which observed variables cause probabilities on stage 1 ( $x_1$  and  $x_{12}$ , but not  $x_2$ ) and on stage 2 ( $x_2$  and  $x_{12}$  but not  $x_1$ ) (see Equation W3-2). The other, ‘the independence model with variable selection’ does not use this prior knowledge and relies on variable selection instead. On the first stage we do not make this distinction because the difference between using prior causal knowledge and variable selection is only a matter of efficiency before any relevant selection. The second column in Table W3.1 lists the covariates, the third column the data generating coefficients and the following columns the estimates for different levels of unobserved correlation.

As expected, we obtain consistent inferences from the independent analysis of the first stage regardless of the correlation with subsequent stages. On the second stage, i.e. after selection, we observe an increasingly positive bias in the constant as the correlation between the stages increases. This is because of the positive expectation of  $\varepsilon_2$  conditional on selection and a positive error correlation. We also see an increasing negative bias in the coefficient for  $x_{12}$ , and when we select variables,  $x_1$  appears to have a significant negative effect on the second stage for correlations equal to .5 and .9. The reason is that consumers with large  $x_1$  or  $x_{12}$  succeed on the first stage even with, relative to other consumers, larger negative draws of  $\varepsilon_1$ . Negative draws of  $\varepsilon_1$  increase the likelihood of negative  $\varepsilon_2$ , given the positive error correlation. As a result, we obtain a downward bias in the effect of  $x_{12}$  and the spurious negative effect of  $x_1$  on the second stage from the independence model.

Table W3.1 Estimated coefficients on the first and the second stage (standard errors)

|                                    | Covariate       | True Values | $\rho = 0$  | $\rho = .1$  | $\rho = .5$ | $\rho = .9$ |
|------------------------------------|-----------------|-------------|-------------|--------------|-------------|-------------|
| <b>Independence models</b>         |                 |             |             |              |             |             |
| <b>1<sup>st</sup> stage</b>        | <b>Constant</b> | <b>-0.4</b> | -0.41 (.02) | -0.39 (.02)  | -0.41 (.02) | -0.41 (.02) |
|                                    | <b>X1</b>       | <b>0.5</b>  | 0.51 (.01)  | 0.50 (.01)   | 0.51 (.01)  | 0.49 (.01)  |
|                                    | <b>X2</b>       | <b>0</b>    | 0           | 0            | 0           | 0           |
|                                    | <b>X12</b>      | <b>0.4</b>  | 0.42 (.01)  | 0.39 (.01)   | 0.41 (.01)  | 0.39 (.01)  |
| <b>... with causal knowledge</b>   |                 |             |             |              |             |             |
| <b>2<sup>nd</sup> stage</b>        | <b>Constant</b> | <b>-0.1</b> | -0.12 (.03) | -0.02 (.03)  | 0.18 (.03)  | 0.53 (.03)  |
|                                    | <b>X1</b>       | <b>0</b>    | 0           | 0            | 0           | 0           |
|                                    | <b>X2</b>       | <b>0.6</b>  | 0.61 (.02)  | 0.59 (.02)   | 0.61 (.02)  | 0.59 (.02)  |
|                                    | <b>X12</b>      | <b>0.4</b>  | 0.39 (.02)  | 0.37 (.02)   | 0.37 (.02)  | 0.28 (.02)  |
| <b>... with variable selection</b> |                 |             |             |              |             |             |
| <b>2<sup>nd</sup> stage</b>        | <b>Constant</b> | <b>-0.1</b> | -0.13 (.04) | -0.01 (.03)  | 0.37 (.04)  | 0.90 (.04)  |
|                                    | <b>X1</b>       | <b>0</b>    | 0.006 (.02) | -0.009 (.02) | -0.13 (.02) | -0.22 (.02) |
|                                    | <b>X2</b>       | <b>0.6</b>  | 0.61 (.02)  | 0.59 (.02)   | 0.62 (.02)  | 0.64 (.02)  |
|                                    | <b>X12</b>      | <b>0.4</b>  | 0.39 (.02)  | 0.37 (.02)   | 0.34 (.02)  | 0.26 (.02)  |
| <b>'collapsing-approach'</b>       |                 |             |             |              |             |             |
| <b>stages collapsed</b>            | <b>Constant</b> | <b>NA</b>   | -1.21 (.02) | -1.14 (.02)  | -1.03 (.02) | -0.84 (.02) |
|                                    | <b>X1</b>       | <b>NA</b>   | 0.32 (.01)  | 0.31 (.01)   | 0.29 (.01)  | 0.27 (.01)  |
|                                    | <b>X2</b>       | <b>NA</b>   | 0.31 (.01)  | 0.29 (.01)   | 0.26 (.01)  | 0.22 (.01)  |
|                                    | <b>X12</b>      | <b>NA</b>   | 0.45 (.01)  | 0.42 (.01)   | 0.41 (.01)  | 0.37 (.01)  |
| <b>Dependence model</b>            |                 |             |             |              |             |             |
| <b>1<sup>st</sup> stage</b>        | <b>Constant</b> | <b>-0.4</b> | -0.41 (.02) | -0.39 (.02)  | -0.41 (.02) | -0.41 (.02) |
|                                    | <b>X1</b>       | <b>0.5</b>  | 0.51 (.01)  | 0.50 (.01)   | 0.51 (.01)  | 0.49 (.01)  |
|                                    | <b>X2</b>       | <b>0</b>    | 0           | 0            | 0           | 0           |
|                                    | <b>X12</b>      | <b>0.4</b>  | 0.42 (.01)  | 0.39 (.01)   | 0.41 (.01)  | 0.39 (.01)  |
| <b>2<sup>nd</sup> stage</b>        | <b>Constant</b> | <b>-0.1</b> | -0.09 (.05) | -0.04 (.05)  | -0.18 (.05) | -0.12 (.04) |
|                                    | <b>X1</b>       | <b>0</b>    | 0           | 0            | 0           | 0           |
|                                    | <b>X2</b>       | <b>0.6</b>  | 0.61 (.02)  | 0.60 (.02)   | 0.61 (.02)  | 0.57 (.02)  |
|                                    | <b>X12</b>      | <b>0.4</b>  | 0.38 (.02)  | 0.37 (.02)   | 0.43 (.02)  | 0.40 (.01)  |

We obtain consistent inferences for the effect of  $x_2$  on the second stage, independent from the size of the correlation and from whether we select variables or not. This is because covariates are generated independently in this simulation. Biases in the coefficients of causally effective variables on the second stage only occur when these variables are correlated with the selection process. However, the (unobserved) variance of  $\varepsilon_2$  conditional on selection is in general smaller than its unconditional counterpart. Rescaling requires knowledge of the data generating  $\varepsilon_2$  draws, which we have in this simulation. In practice, without this knowledge, consistency implies that coefficient ratios of variables that are independent from the selection process can be estimated consistently from selected samples.

Next, Table W3.1 reports parameter estimates from the collapsing-approach. Because the collapsing-approach ignores the nonlinearity due to the first stage selection, there exists no general functional relationship between the data generating parameters and the coefficients reported. As the correlation between stages increases, the constant increases and all slope coefficients decrease. Finally, Table W3.1 reports the coefficient estimates from the dependence model that recovers all coefficients for all levels of unobserved dependence up to posterior uncertainty, as it should.

Independent analyses suggest that consumers high on  $x_1$  are more likely to pass the first stage but less likely to pass the second stage when the correlation between stages is larger or equal to .5. Consequently, a decision maker interested in targeting consumers based on covariates will be conflicted regarding which levels of  $x_1$  to target. Numerically solving for the  $x_1$  level that maximizes the probability that the observed population (as characterized by the joint distribution of observed covariates in Equation W3-2) succeeds on stages 1 and 2 results in optimal  $x_1$  targets of 6.85, 3.93 and 3.34 for correlation of .1, .5 and .9 respectively. These target values are by factors of 1.4, 2.2, and 2.5 respectively smaller than the optimal  $x_1$  target implied by dependent analysis. Of course, dependent analysis in this case leads to targeting the maximal  $x_1$  values in the population.

In similarly selected samples of consumers on the second stage, the spurious negative effect of  $x_1$  could be exploited for scoring purposes. However, marketing actions directed at lowering the levels of  $x_1$  on the second stage will result in a null effect because  $x_1$  is not causally effective on this stage.

Table W3.2 summarizes the differences between the data generating probabilities for passing both stages and those approximated by the collapsing-model, independent analyses, and finally those estimated by the dependence model.

Table W3.2 Distribution of (absolute) deviations from data generating probabilities (n=10,000).

|                                |                                          | $\rho = 0$    | $\rho = .1$   | $\rho = .5$   | $\rho = .9$  |
|--------------------------------|------------------------------------------|---------------|---------------|---------------|--------------|
| <b>Mean Absolute Deviation</b> | <b>Collapsing</b>                        | .043          | .044          | .057          | .073         |
|                                | <b>Independent w. causal knowledge</b>   | .004          | .005          | .016          | .032         |
|                                | <b>Independent w. variable selection</b> | .004          | .005          | .008          | .015         |
|                                | <b>Dependence Model</b>                  | .004          | .005          | .006          | .007         |
| <b>[10%, 90%] (Deviation)</b>  | <b>Collapsing</b>                        | [-.07, .08]   | [-.07, .08]   | [-.09, .11]   | [-.12, .13]  |
|                                | <b>Independent w. causal knowledge</b>   | [-.004, .008] | [-.009, .009] | [-.02, .03]   | [-.05, .05]  |
|                                | <b>Independent w. variable selection</b> | [-.004, .008] | [-.008, .008] | [-.003, .01]  | [-.02, .02]  |
|                                | <b>Dependence Model</b>                  | [-.005, .008] | [-.008, .008] | [-.0004, .02] | [-.004, .02] |
| <b>Stddev(Deviation)</b>       | <b>Collapsing</b>                        | .07           | .07           | .09           | .10          |
|                                | <b>Independent w. causal knowledge</b>   | .006          | .008          | .02           | .05          |
|                                | <b>Independent w. variable selection</b> | .006          | .007          | .01           | .02          |
|                                | <b>Dependence Model</b>                  | .006          | .007          | .007          | .009         |

The discrepancies between the data generating and the approximated probabilities increase as the unobserved dependence between selection stages increases. The collapsing-approach approximates the data generating probabilities much worse than independent analyses of the selection stages across all correlations investigated. The corresponding mean absolute deviation

between estimated and data generating probabilities is large. The 10<sup>th</sup>-percentile and the 90<sup>th</sup>-percentile of the deviations between estimated and data generating probabilities are most extreme and the standard deviation of the distribution of approximation errors is largest. This demonstrates that the collapsing-approach is not a viable approximation to the (stochastic) non-linearity introduced by selection, even without unobserved dependence across selection stages.

Comparing independent analyses with causal knowledge to independent analyses relying on variable selection nicely illustrates how the spurious effect of  $x_1$  on the second stage proxies for the unobserved heterogeneity creating dependence between the selection stages. For example, when the correlation is equal to .9 the mean absolute deviation decreases from 3.2% to 1.5% when  $x_1$  is included on the second stage.

Table W3.3 compares the lists of the 1,000, 2,000 and 5,000 top ranked consumers, i.e. rankings of  $P(y_{1,i} = 1, y_{2,i} = 1 \mid \mathbf{x}_i, \text{Model})$  from the data generating probabilities to the collapsing-model, independent analyses, and finally to the estimated dependence model in terms of list overlap. 100% overlap indicates that a model includes the very same consumers as the data generating model in the respective list. Zero percent overlap indicates that a model and the data generating model identify completely different lists of consumers.

The collapsing-model performs worst across all list lengths and correlations in terms of overlap with the lists from the data generating model. Moving from left to right in Table W3.3 the correlation between the selection stages increases and this decreases the overlap between estimated lists and the list from the data generating probabilities, except when the data generating dependence model is estimated.

The independence model with variable selection outperforms that using prior causal knowledge that  $x_1$  is ineffective on the second stage when the correlation becomes large, i.e. .5 or .9.

Relative to the expected overlaps of 10%, 20% and 50% from random lists<sup>4</sup>, all models add more information in the tails of the consumer distribution. Overall, the close performance of independent analyses when spurious variables are included, i.e. without causal knowledge, compared to estimates from the data generating dependence model is remarkable when the goal is to simply score, with no direct preferences or utility over covariates that describe consumers.

Table W3.3 Consumer scoring, n = 10,000

| List     | Model                             | $\rho = 0$ | $\rho = .1$ | $\rho = .5$ | $\rho = .9$ |
|----------|-----------------------------------|------------|-------------|-------------|-------------|
| TOP 1000 | Collapsing selections             | 82.4 %     | 84.4 %      | 80.7 %      | 76.6 %      |
|          | Independent w. causal knowledge   | 98.3 %     | 98.4 %      | 95.9 %      | 87.7 %      |
|          | Independent w. variable selection | 98.8 %     | 98.5 %      | 97.9 %      | 95.9 %      |
|          | Dependence Model                  | 98.6 %     | 98.5 %      | 98.8 %      | 98.9 %      |
| TOP 2000 | Collapsing selections             | 87.4 %     | 87.6 %      | 84.3 %      | 82.1 %      |
|          | Independent w. causal knowledge   | 99.2 %     | 98.7 %      | 97.0 %      | 91.7 %      |
|          | Independent w. variable selection | 99.1 %     | 99.0 %      | 99.0 %      | 96.3 %      |
|          | Dependence Model                  | 99.2 %     | 98.9 %      | 99.2 %      | 99.0 %      |
| TOP 5000 | Collapsing selections             | 93.4 %     | 93.1 %      | 91.0 %      | 88.5 %      |
|          | Independent w. causal knowledge   | 99.5 %     | 99.2 %      | 97.6 %      | 95.2 %      |
|          | Independent w. variable selection | 99.6 %     | 99.3 %      | 99.3 %      | 97.6 %      |
|          | Dependence Model                  | 99.6 %     | 99.3 %      | 99.3 %      | 99.4 %      |

Customer scoring, i.e. scoring based on  $P(y_{2,i} = 1 \mid \mathbf{x}_i, y_{1,i} = 1, \text{Model})$  is only defined for the data generating model and independent analyses. It is not defined in the collapsing-approach because the collapsing-approach glosses over all intermediate selection stages. Table W3.4 compares the lists of top ranked customers conditional on having passed the first selection, i.e. rankings of  $P(y_{2,i} = 1 \mid \mathbf{x}_i, y_{1,i} = 1, \text{Model})$  from the data generating probabilities to the independent analysis with prior knowledge of causal effects, that using variable selection instead, and finally the

<sup>4</sup> With a sample size of 10,000 the expected overlap between fixed lists of length 1000, 2000, 5000 and randomly picked lists of the same length is 10%, 20%, 50%, respectively.

estimated dependence model. We use relative list lengths here because the number of customers on the second stage is random.

We find that increasing the correlation decreases the overlap for both independent analyses. Estimates from the dependence model perform stably, as they should. Ignoring causal knowledge and including spurious variables in the independent analysis helps significantly once correlations become larger. The differences between estimates from the data generating dependence model and independent analysis including spurious variables is larger when we score customers that have passed the first stage as in Table W3.4 compared to scoring consumers that are before the first selection as in Table W3.3. This is because the dependence model learns about unobserved heterogeneity through the realized error on stage one when stages are dependent.

Table W3.4 Customer scoring, customer-n (after the first selection) approximately equal to 4,000, consumer n = 10,000 before any selection

|                 | <b>Model</b>                      | <b>Rho = 0</b> | <b>Rho =.1</b> | <b>Rho =.5</b> | <b>Rho =.9</b> |
|-----------------|-----------------------------------|----------------|----------------|----------------|----------------|
| <b>TOP 10 %</b> | <b>Ind. w. causal knowledge</b>   | 99.0 %         | 97.8 %         | 86.8 %         | 63.5 %         |
|                 | <b>Ind. w. variable selection</b> | 98.5 %         | 98.3 %         | 95.5 %         | 81.0 %         |
|                 | <b>Dependence Model</b>           | 98.5 %         | 98.0 %         | 98.5 %         | 97.5 %         |
| <b>TOP 25 %</b> | <b>Ind. w. causal knowledge</b>   | 98.7 %         | 98.1 %         | 89.9 %         | 76.6 %         |
|                 | <b>Ind. w. variable selection</b> | 98.7 %         | 98.3 %         | 97.5 %         | 89.2 %         |
|                 | <b>Dependence Model</b>           | 98.5 %         | 98.3 %         | 98.8 %         | 97.7 %         |
| <b>TOP 50 %</b> | <b>Ind. w. causal knowledge</b>   | 99.2 %         | 98.5 %         | 95.3 %         | 88.2 %         |
|                 | <b>Ind. w. variable selection</b> | 99.2 %         | 98.8 %         | 98.2 %         | 95.4 %         |
|                 | <b>Dependence Model</b>           | 99.2 %         | 98.7 %         | 99.2 %         | 99.3 %         |

We conclude from our illustrative simulation that independent analyses of selection stages will result in misleading targeting recommendations and influencing actions when unobserved causes connect the selection stages. Independent analyses with variable selection perform surprisingly well when the goal is a simple measurement of probabilities at the price of including spurious variables.

The collapsing-approach fails at this task because of the non-linearity of the selection process. This contrasts to consistent results obtained when mediators are ignored in linear systems. Thus, a firm may successfully score consumers, ignoring dependence between successive selections in a stable environment, claim only epsilon benefits from more advanced modeling, and be surprised by the failure of targeting and influencing decisions based on the same analysis.
